# Supplementary material for: Analysis of Association between Breastfeeding and Vegetable or Fruit Intake in Later Childhood in a Population-Based Observational Study
Source: PubMed Central journal article supplement (PMC7312394; doi:10.3390/ijerph17113755), 2020-05-26
Supplement: ijerph-17-03755-s001.pdf [file ijerph-17-03755-s001.pdf]

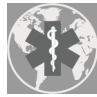

# Analysis of Association between Breastfeeding and Vegetable or Fruit Intake in Later Childhood in a Population-based Observational Study

Jadwiga Hamulka\*, Monika A. Zielinska, Marta Jeruszka-Bielak, Magdalena Górnicka, Dominika Głąbska, Dominika Guzek, Monika Hoffmann and Krystyna Gutkowska

## Supplementary Materials

**Table S1.** The associations between breastfeeding duration and vegetable and fruit consumption for second breakfast.

| Group | Breastfeeding duration | Vegetable consumption                                          |                                                   |                                      | Fruit consumption                                              |                                                   |                                      |
|-------|------------------------|----------------------------------------------------------------|---------------------------------------------------|--------------------------------------|----------------------------------------------------------------|---------------------------------------------------|--------------------------------------|
|       |                        | Model 1 <sup>1</sup><br>OR <sup>4</sup> (95% CI <sup>5</sup> ) | Model 2 <sup>2</sup><br>aOR <sup>6</sup> (95% CI) | Model 3 <sup>3</sup><br>aOR (95% CI) | Model 1 <sup>1</sup><br>OR <sup>4</sup> (95% CI <sup>5</sup> ) | Model 2 <sup>2</sup><br>aOR <sup>6</sup> (95% CI) | Model 3 <sup>3</sup><br>aOR (95% CI) |
| Total | No breastfeeding       |                                                                | Ref. 1                                            |                                      | Ref. 1                                                         |                                                   |                                      |
|       | 0.2–3 months           | 1.54 (0.79–3.17)                                               | 1.65 (0.84–3.24)                                  | 1.63 (0.83–3.22)                     | 1.24 (0.76–2.04)                                               | 1.28 (0.78–2.68)                                  | 1.27 (0.82–2.11)                     |
|       | 4–6 months             | 1.33 (0.68–2.70)                                               | 1.39 (0.70–2.76)                                  | 1.37 (0.69–2.73)                     | 1.26 (0.77–2.06)                                               | 1.29 (0.78–3.15)                                  | 1.28 (0.95–2.12)                     |
|       | 7–12 months            | 1.36 (0.70–2.70)                                               | 1.24 (0.63–2.47)                                  | 1.26 (0.63–2.49)                     | 1.12 (0.69–1.84)                                               | 1.10 (0.66–2.42)                                  | 1.10 (0.74–1.82)                     |
|       | >12 months             | 1.29 (0.60–3.30)                                               | 1.29 (0.59–2.82)                                  | 1.32 (0.60–2.91)                     | 0.97 (0.49–1.55)                                               | 1.00 (0.50–1.98)                                  | 1.00 (0.50–1.62)                     |
| Girls | No breastfeeding       |                                                                | Ref. 1                                            |                                      | Ref. 1                                                         |                                                   |                                      |
|       | 0.2–3 months           | 0.95 (0.39–2.33)                                               | 1.05 (0.41–2.65)                                  | 1.06 (0.42–2.70)                     | 1.99 (0.95–4.14)                                               | 2.22 (1.04–4.73)*                                 | 2.23 (1.05–4.76)*                    |
|       | 4–6 months             | 0.88 (0.36–1.15)                                               | 0.89 (0.35–2.26)                                  | 0.90 (0.35–2.29)                     | 1.47 (0.71–3.03)                                               | 1.56 (0.74–3.30)                                  | 1.56 (0.74–3.31)                     |
|       | 7–12 months            | 1.23 (0.53–2.87)                                               | 1.15 (0.48–2.78)                                  | 1.20 (0.50–2.89)                     | 1.07 (0.53–2.18)                                               | 1.04 (0.50–2.16)                                  | 1.06 (0.51–2.20)                     |
|       | >12 months             | 0.95 (0.34–2.69)                                               | 0.92 (0.32–2.66)                                  | 0.93 (0.32–2.71)                     | 1.15 (0.49–2.67)                                               | 1.22 (0.52–2.87)                                  | 1.23 (0.52–2.90)                     |
| Boys  | No breastfeeding       |                                                                | Ref. 1                                            |                                      | Ref. 1                                                         |                                                   |                                      |
|       | 0.2–3 months           | 2.72 (0.96–7.74)                                               | 2.70 (0.93–7.82)                                  | 2.57 (0.88–7.48)                     | 1.08 (0.43–1.66)                                               | 1.18 (0.41–1.61)                                  | 1.15 (0.40–1.59)                     |
|       | 4–6 months             | 2.22 (0.77–6.41)                                               | 2.30 (0.78–6.80)                                  | 2.23 (0.75–6.61)                     | 1.10 (0.56–2.15)                                               | 1.05 (0.53–2.08)                                  | 1.03 (0.52–2.05)                     |
|       | 7–12 months            | 1.48 (0.48–4.51)                                               | 1.38 (0.44–4.33)                                  | 1.32 (0.42–4.18)                     | 1.19 (0.60–2.37)                                               | 1.20 (0.59–2.43)                                  | 1.19 (0.59–2.42)                     |
|       | >12 months             | 1.96 (0.59–6.46)                                               | 1.95 (0.58–6.55)                                  | 2.02 (0.60–6.83)                     | 1.09 (0.31–2.52)                                               | 1.08 (0.31–1.60)                                  | 1.07 (0.32–1.60)                     |

<sup>1</sup> Model 1 – unadjusted model; <sup>2</sup> Model 2 – model adjusted for children age, BMI centile (and gender in total group), maternal education, employment status and family economic situation; <sup>3</sup> Model 3 – Model 2 adjusted for EU–28 average PKB region; <sup>4</sup> OR – odds ratio; <sup>5</sup> CI – confidence interval; <sup>6</sup> aOR – adjusted odds ratio; \* –  $p \leq 0.05$ .

**Table S2.** The associations between breastfeeding duration and vegetable and fruit consumption between meals.

| Group        | Breastfeeding duration | Vegetable consumption                                          |                                                   |                                      | Fruit consumption                                              |                                                   |                                      |
|--------------|------------------------|----------------------------------------------------------------|---------------------------------------------------|--------------------------------------|----------------------------------------------------------------|---------------------------------------------------|--------------------------------------|
|              |                        | Model 1 <sup>1</sup><br>OR <sup>4</sup> (95% CI <sup>5</sup> ) | Model 2 <sup>2</sup><br>aOR <sup>6</sup> (95% CI) | Model 3 <sup>3</sup><br>aOR (95% CI) | Model 1 <sup>1</sup><br>OR <sup>4</sup> (95% CI <sup>5</sup> ) | Model 2 <sup>2</sup><br>aOR <sup>6</sup> (95% CI) | Model 3 <sup>3</sup><br>aOR (95% CI) |
| <b>Total</b> | No breastfeeding       |                                                                | Ref. 1                                            |                                      |                                                                | Ref. 1                                            |                                      |
|              | 0.2–3 months           | 1.44 (0.36–5.71)                                               | 1.46 (0.36–5.87)                                  | 1.44 (0.36–5.78)                     | 1.02 (0.62–1.68)                                               | 1.07 (0.64–1.79)                                  | 1.08 (0.65–1.81)                     |
|              | 4–6 months             | 1.79 (0.17–3.58)                                               | 1.86 (0.18–3.79)                                  | 1.83 (0.18–3.85)                     | 1.31 (0.79–2.16)                                               | 1.38 (0.82–2.32)                                  | 1.39 (0.83–2.33)                     |
|              | 7–12 months            | 1.38 (0.35–5.47)                                               | 1.45 (0.36–5.91)                                  | 1.41 (0.35–5.75)                     | 1.95 (0.58–1.55)                                               | 1.89 (0.53–1.48)                                  | 1.89 (0.53–1.49)                     |
|              | >12 months             | 2.85 (0.71–5.38)                                               | 3.20 (0.79–5.98)                                  | 3.23 (0.80–6.11)                     | 1.88 (0.49–1.57)                                               | 1.87 (0.49–1.57)                                  | 0.87 (0.48–1.56)                     |
| <b>Girls</b> | No breastfeeding       |                                                                | Ref. 1                                            |                                      |                                                                | Ref. 1                                            |                                      |
|              | 0.2–3 months           | 1.30 (0.23–7.36)                                               | 1.36 (0.22–8.59)                                  | 1.37 (0.22–8.66)                     | 1.88 (0.40–2.93)                                               | 1.94 (0.41–2.11)                                  | 1.94 (0.42–2.14)                     |
|              | 4–6 months             | 1.29 (0.03–3.30)                                               | 1.23 (0.02–2.80)                                  | 1.24 (0.24–2.93)                     | 0.91 (0.41–2.98)                                               | 1.98 (0.43–2.21)                                  | 1.94 (0.41–2.13)                     |
|              | 7–12 months            | 1.07 (0.19–6.06)                                               | 1.02 (0.14–5.82)                                  | 0.92 (0.14–5.84)                     | 1.59 (0.28–1.25)                                               | 1.55 (0.25–2.20)                                  | 1.53 (0.24–2.17)                     |
|              | >12 months             | 1.21 (0.16–9.00)                                               | 1.33 (0.16–10.88)                                 | 1.33 (0.16–10.92)                    | 1.76 (0.31–1.88)                                               | 1.81 (0.32–2.04)                                  | 1.81 (0.32–2.04)                     |
| <b>Boys</b>  | No breastfeeding       |                                                                | Ref. 1                                            |                                      |                                                                | Ref. 1                                            |                                      |
|              | 0.2–3 months           | 1.79 (0.18–7.62)                                               | 1.55 (0.15–5.93)                                  | 1.56 (0.15–6.32)                     | 1.17 (0.60–2.30)                                               | 1.18 (0.60–2.34)                                  | 1.19 (0.60–2.37)                     |
|              | 4–6 months             | 1.79 (0.18–7.62)                                               | 1.44 (0.13–5.43)                                  | 1.51 (0.14–6.21)                     | 1.75 (0.89–3.46)                                               | 1.80 (0.90–3.60)                                  | 1.82 (0.91–3.65)                     |
|              | 7–12 months            | 1.96 (0.20–4.76)                                               | 1.80 (0.17–6.89)                                  | 1.85 (0.17–9.64)                     | 1.37 (0.69–2.72)                                               | 1.30 (0.64–2.63)                                  | 1.30 (0.64–2.64)                     |
|              | >12 months             | 6.16 (0.69–9.38)                                               | 6.77 (0.74–8.03)                                  | 7.08 (0.77–9.47)                     | 1.01 (0.45–2.16)                                               | 1.02 (0.42–2.03)                                  | 1.02 (0.42–2.03)                     |

<sup>1</sup> Model 1–unadjusted model; <sup>2</sup> Model 2–model adjusted for children age, BMI centile (and gender in total group), maternal education, employment status and family economic situation; <sup>3</sup> Model 3–Model 2 adjusted for EU–28 average PKB region; <sup>4</sup> OR–odds ratio; <sup>5</sup> CI–confidence interval; <sup>6</sup> aOR–adjusted odds ratio.
